# Supplementary material for: Fast Identification and Removal of Sequence Contamination from Genomic and Metagenomic Datasets
Source: PubMed Central journal article supplement (PMC3052304; doi:10.1371/journal.pone.0017288), 2011-03-09
Supplement: pone.0017288.s002.pdf [file pone.0017288.s002.pdf]

| MG_ID | PubMed ID | Type (V/M/E) | Sequencing method | Sample name in publication | Biome           | Environment | Sub-classification | # Reads (Filtered) | Mean Length (Filtered) | # Contamination C95-I94 | % Contamination |
|-------|-----------|--------------|-------------------|----------------------------|-----------------|-------------|--------------------|--------------------|------------------------|-------------------------|-----------------|
| 1     | 16336043  | Viral        | ABI3730 (Sanger)  | Lib 1                      | Host-associated | Human       | fecal              | 2311               | 215.41                 | 1                       | 0.04            |
| 2     | 16336043  | Viral        | ABI3730 (Sanger)  | Lib 2                      | Host-associated | Human       | fecal              | 4358               | 197.07                 | 64                      | 1.47            |
| 3     | 16336043  | Viral        | ABI3730 (Sanger)  | Lib 3                      | Host-associated | Human       | fecal              | 3122               | 198.72                 | 14                      | 0.45            |
| 4     | 16741115  | Microbial    | ABI3730 (Sanger)  | Subject 7                  | Host-associated | Human       | fecal              | 71581              | 827.46                 | 13                      | 0.02            |
| 5     | 16741115  | Microbial    | ABI3730 (Sanger)  | Subject 8                  | Host-associated | Human       | fecal              | 81219              | 843.85                 | 10                      | 0.01            |
| 6     | 17620602  | Viral        | GS20 Assembled    | TM7a assembly              | Host-associated | Human       | oral               | 8543               | 328.84                 | 58                      | 0.68            |
| 7     | 20333224  | Microbial    | ABI3730 (Sanger)  | M-1m                       | Host-associated | Human       | fecal              | 1981               | 665.11                 | 0                       | 0.00            |
| 8     | 20333224  | Microbial    | ABI3730 (Sanger)  | M-11m                      | Host-associated | Human       | fecal              | 2056               | 681.17                 | 0                       | 0.00            |
| 9     | 20333224  | Microbial    | ABI3730 (Sanger)  | I-1m                       | Host-associated | Human       | fecal              | 1778               | 581.33                 | 2                       | 0.11            |
| 10    | 20333224  | Microbial    | ABI3730 (Sanger)  | I-11m                      | Host-associated | Human       | fecal              | 2092               | 679.93                 | 0                       | 0.00            |
| 11    | 17916580  | Microbial    | ABI3730 (Sanger)  | F1-S                       | Host-associated | Human       | fecal              | 28780              | 1294.96                | 0                       | 0.00            |
| 12    | 17916580  | Microbial    | ABI3730 (Sanger)  | F1-T                       | Host-associated | Human       | fecal              | 36211              | 1180.99                | 4                       | 0.01            |
| 13    | 17916580  | Microbial    | ABI3730 (Sanger)  | F1-U                       | Host-associated | Human       | fecal              | 16156              | 1277.71                | 0                       | 0.00            |
| 14    | 17916580  | Microbial    | ABI3730 (Sanger)  | F2-V                       | Host-associated | Human       | fecal              | 36364              | 1257.55                | 0                       | 0.00            |
| 15    | 17916580  | Microbial    | ABI3730 (Sanger)  | F2-W                       | Host-associated | Human       | fecal              | 29991              | 1299.66                | 0                       | 0.00            |
| 16    | 17916580  | Microbial    | ABI3730 (Sanger)  | F2-X                       | Host-associated | Human       | fecal              | 30927              | 1200.45                | 5                       | 0.02            |
| 17    | 17916580  | Microbial    | ABI3730 (Sanger)  | F2-Y                       | Host-associated | Human       | fecal              | 35059              | 1290.49                | 3                       | 0.01            |
| 18    | 17916580  | Microbial    | ABI3730 (Sanger)  | In-A                       | Host-associated | Human       | fecal              | 19446              | 1340.48                | 6                       | 0.03            |
| 19    | 17916580  | Microbial    | ABI3730 (Sanger)  | In-B                       | Host-associated | Human       | fecal              | 9731               | 1227.09                | 0                       | 0.00            |
| 20    | 17916580  | Microbial    | ABI3730 (Sanger)  | In-D                       | Host-associated | Human       | fecal              | 36763              | 1211.51                | 2                       | 0.01            |
| 21    | 17916580  | Microbial    | ABI3730 (Sanger)  | In-E                       | Host-associated | Human       | fecal              | 19988              | 1253.84                | 0                       | 0.00            |
| 22    | 17916580  | Microbial    | ABI3730 (Sanger)  | In-M                       | Host-associated | Human       | fecal              | 15075              | 1461.72                | 20                      | 0.13            |
| 23    | 17916580  | Microbial    | ABI3730 (Sanger)  | In-R                       | Host-associated | Human       | fecal              | 34693              | 1247.41                | 17                      | 0.05            |
| 24    | 19043404  | Microbial    | GS FLX            | F1T1Le1                    | Host-associated | Human       | fecal              | 217129             | 238.09                 | 13                      | 0.01            |
| 25    | 19043404  | Microbial    | GS FLX            | F1T2Le1                    | Host-associated | Human       | fecal              | 440326             | 178.68                 | 0                       | 0.00            |
| 26    | 19043404  | Microbial    | GS FLX            | F1MOv1                     | Host-associated | Human       | fecal              | 508663             | 201.72                 | 5                       | 0.00            |
| 27    | 19043404  | Microbial    | GS FLX            | F2T1Le1                    | Host-associated | Human       | fecal              | 414067             | 229.36                 | 18                      | 0.00            |
| 28    | 19043404  | Microbial    | GS FLX            | F2T2Le1                    | Host-associated | Human       | fecal              | 487258             | 206.13                 | 77                      | 0.02            |
| 29    | 19043404  | Microbial    | GS FLX            | F2MOb1                     | Host-associated | Human       | fecal              | 534474             | 221.05                 | 27                      | 0.01            |
| 30    | 19043404  | Microbial    | GS FLX            | F3T1Le1                    | Host-associated | Human       | fecal              | 555519             | 242.79                 | 5                       | 0.00            |
| 31    | 19043404  | Microbial    | GS FLX            | F3T2Le1                    | Host-associated | Human       | fecal              | 414225             | 242.64                 | 13                      | 0.00            |
| 32    | 19043404  | Microbial    | GS FLX            | F3MOv1                     | Host-associated | Human       | fecal              | 499318             | 249.86                 | 12                      | 0.00            |
| 33    | 19043404  | Microbial    | GS FLX            | F7T1Ob1                    | Host-associated | Human       | fecal              | 495058             | 165.52                 | 5                       | 0.00            |
| 34    | 19043404  | Microbial    | GS FLX            | F7T2Ob1                    | Host-associated | Human       | fecal              | 491044             | 199.31                 | 13                      | 0.00            |
| 35    | 19043404  | Microbial    | GS FLX            | F7MOb1                     | Host-associated | Human       | fecal              | 412637             | 215.04                 | 3                       | 0.00            |
| 36    | 19043404  | Microbial    | GS FLX Titanium   | F10T1Ob1                   | Host-associated | Human       | fecal              | 301864             | 335.89                 | 2                       | 0.00            |
| 37    | 19043404  | Microbial    | GS FLX Titanium   | F10T2Ob1                   | Host-associated | Human       | fecal              | 501314             | 345.76                 | 6                       | 0.00            |
| 38    | 19043404  | Microbial    | GS FLX            | F10MOv1                    | Host-associated | Human       | fecal              | 492709             | 191.31                 | 8                       | 0.00            |
| 39    | 19043404  | Microbial    | GS FLX            | F15T1Ob1                   | Host-associated | Human       | fecal              | 512517             | 178.89                 | 34                      | 0.01            |
| 40    | 19043404  | Microbial    | GS FLX            | F15T2Ob1                   | Host-associated | Human       | fecal              | 545842             | 204.86                 | 30                      | 0.01            |
| 41    | 19043404  | Microbial    | GS FLX            | F15MOB1                    | Host-associated | Human       | fecal              | 430549             | 188.51                 | 21                      | 0.00            |
| 42    | 19156205  | Viral        | GS FLX            | F1                         | Host-associated | Human       | nasal              | 24839              | 155.83                 | 14950                   | 60.19           |
| 43    | 19156205  | Viral        | GS FLX            | F2                         | Host-associated | Human       | nasal              | 20345              | 153.62                 | 12908                   | 63.45           |
| 44    | 19156205  | Viral        | GS FLX            | F3                         | Host-associated | Human       | nasal              | 18289              | 165.04                 | 11772                   | 64.37           |
| 45    | 19156205  | Viral        | GS FLX            | N1                         | Host-associated | Human       | fecal              | 10495              | 166.69                 | 4                       | 0.04            |
| 46    | 19156205  | Viral        | GS FLX            | N2                         | Host-associated | Human       | fecal              | 24357              | 175.08                 | 5                       | 0.02            |
| 47    | 19156205  | Viral        | GS FLX            | N3                         | Host-associated | Human       | fecal              | 17884              | 170.01                 | 2                       | 0.01            |
| 48    | 19156205  | Viral        | GS FLX            | N4                         | Host-associated | Human       | fecal              | 13441              | 170.54                 | 1088                    | 8.09            |
| 49    | 19156205  | Viral        | GS FLX            | N5                         | Host-associated | Human       | fecal              | 22089              | 176.89                 | 34                      | 0.15            |
| 50    | 19816605  | Viral        | GS FLX            | NonCF1Asthma               | Host-associated | Human       | sputum             | 266799             | 224.1                  | 30753                   | 11.53           |
| 51    | 19816605  | Viral        | GS FLX            | NonCF2                     | Host-associated | Human       | sputum             | 251533             | 217.09                 | 59714                   | 23.74           |
| 52    | 19816605  | Viral        | GS FLX            | NonCF3                     | Host-associated | Human       | sputum             | 226902             | 229.24                 | 12585                   | 5.55            |
| 53    | 19816605  | Viral        | GS FLX            | NonCF4Spouse               | Host-associated | Human       | sputum             | 310921             | 223.83                 | 74722                   | 24.03           |
| 54    | 19816605  | Viral        | GS FLX            | NonCF5                     | Host-associated | Human       | sputum             | 311908             | 213.49                 | 30192                   | 9.68            |

| MG_ID | PubMed ID | Type (V/M/E) | Sequencing method | Sample name in publication      | Biome           | Environment     | Sub-classification | # Reads (Filtered) | Mean Length (Filtered) | # Contamination C95-I94 | % Contamination |
|-------|-----------|--------------|-------------------|---------------------------------|-----------------|-----------------|--------------------|--------------------|------------------------|-------------------------|-----------------|
| 55    | 19816605  | Viral        | GS FLX            | CF1                             | Host-associated | Human           | sputum             | 162552             | 220.82                 | 16463                   | 10.13           |
| 56    | 19816605  | Viral        | GS FLX            | CF2                             | Host-associated | Human           | sputum             | 193398             | 222.28                 | 6519                    | 3.37            |
| 57    | 19816605  | Viral        | GS FLX            | CF3                             | Host-associated | Human           | sputum             | 162534             | 238.19                 | 23746                   | 14.61           |
| 58    | 19816605  | Viral        | GS FLX            | CF4                             | Host-associated | Human           | sputum             | 241965             | 202.41                 | 26268                   | 10.86           |
| 59    | 19816605  | Viral        | GS FLX            | CF5                             | Host-associated | Human           | sputum             | 194766             | 221.47                 | 16448                   | 8.45            |
| 60    | 20547834  | Viral        | GS FLX            | Choloroformed                   | Host-associated | Human           | oropharyngeal      | 214440             | 203.95                 | 5489                    | 2.56            |
| 61    | 20547834  | Viral        | GS FLX            | Filtered                        | Host-associated | Human           | oropharyngeal      | 243844             | 218.64                 | 8297                    | 3.40            |
| 62    | 20368178  | Microbial    | GS FLX            | LF/PP 1dpc group1               | Host-associated | Mouse           | fecal              | 34849              | 224.23                 | 0                       | 0.00            |
| 63    | 20368178  | Microbial    | GS FLX            | LF/PP 7dpc group1               | Host-associated | Mouse           | fecal              | 40458              | 229.36                 | 0                       | 0.00            |
| 64    | 20368178  | Microbial    | GS FLX            | LF/PP 28dpc group1              | Host-associated | Mouse           | fecal              | 28795              | 223.46                 | 4                       | 0.01            |
| 65    | 20368178  | Microbial    | GS FLX            | LF/PP 29dpc group1              | Host-associated | Mouse           | fecal              | 34291              | 223.44                 | 2                       | 0.01            |
| 66    | 20368178  | Microbial    | GS FLX            | LF/PP 35dpc group1              | Host-associated | Mouse           | fecal              | 32989              | 231.09                 | 0                       | 0.00            |
| 67    | 20368178  | Microbial    | GS FLX            | LF/PP 1dpc group2               | Host-associated | Mouse           | fecal              | 40608              | 227.95                 | 1                       | 0.00            |
| 68    | 20368178  | Microbial    | GS FLX            | LF/PP 7dpc group2               | Host-associated | Mouse           | fecal              | 32859              | 228.95                 | 3                       | 0.01            |
| 69    | 20368178  | Microbial    | GS FLX            | LF/PP 28dpc group2              | Host-associated | Mouse           | fecal              | 52078              | 233.12                 | 2                       | 0.00            |
| 70    | 20368178  | Microbial    | GS FLX            | Western 1dpc (29dpc) group2     | Host-associated | Mouse           | fecal              | 33983              | 224.88                 | 9                       | 0.03            |
| 71    | 20368178  | Microbial    | GS FLX            | Western 7dpc (35dpc) group2     | Host-associated | Mouse           | fecal              | 34854              | 219.75                 | 4                       | 0.01            |
| 72    | 20368178  | Microbial    | GS FLX            | Donor                           | Host-associated | Human           | fecal              | 34203              | 229.52                 | 2                       | 0.01            |
| 73    | 20668486  | Microbial    | GS FLX + ABI3730  | Assembled fosmids               | Host-associated | Kangaroo        | fecal              | 53275              | 964.14                 | 8                       | 0.02            |
| 74    | 18033299  | Microbial    | ABI3730 assembled | Termite gut                     | Host-associated | Termite         | content            | 54992              | 998                    | 0                       | 0.00            |
| 75    | 15845853  | Microbial    | ABI3730 (Sanger)  | Whale fall 1                    | Aquatic         | Marine          | Whale fall         | 38404              | 1013.92                | 0                       | 0.00            |
| 76    | 15845853  | Microbial    | ABI3730 (Sanger)  | Whale fall 2                    | Aquatic         | Marine          | Whale fall         | 38215              | 987.94                 | 0                       | 0.00            |
| 77    | 15845853  | Microbial    | ABI3730 (Sanger)  | Whale fall 3                    | Aquatic         | Marine          | Whale fall         | 40411              | 1013.17                | 0                       | 0.00            |
| 78    | 15845853  | Microbial    | ABI3730 (Sanger)  | Soil                            | Terrestrial     | Soil            | Farm soil          | 138953             | 1037.93                | 0                       | 0.00            |
| 79    | 0         | Microbial    | ABI3730 (Sanger)  | PB sand DNA                     | Terrestrial     | Soil            | Beach sand         | 4981               | 678.58                 | 5                       | 0.10            |
| 80    | 19788654  | Microbial    | GS FLX            | HOT186_25m                      | Aquatic         | Marine          | seawater           | 607109             | 218.36                 | 116                     | 0.02            |
| 81    | 19788654  | Microbial    | GS FLX            | HOT186_75m                      | Aquatic         | Marine          | seawater           | 660453             | 206.06                 | 98                      | 0.01            |
| 82    | 19788654  | Microbial    | GS FLX            | HOT186_110m                     | Aquatic         | Marine          | seawater           | 463788             | 232.34                 | 390                     | 0.08            |
| 83    | 19788654  | Microbial    | GS FLX            | HOT186_500m                     | Aquatic         | Marine          | seawater           | 982172             | 231.21                 | 119                     | 0.01            |
| 84    | 17921274  | Viral        | ABI3730 (Sanger)  | Chesapeake Bay metagenome       | Aquatic         | Marine          | Virioplankton      | 5641               | 694.92                 | 1                       | 0.02            |
| 85    | 18987310  | Microbial    | ABI3730 (Sanger)  | EM                              | Aquatic         | Marine          | worm (epibiont)    | 128909             | 1143.03                | 2                       | 0.00            |
| 86    | 16980956  | Microbial    | ABI3730 (Sanger)  | Symbiont metagenome             | Host-associated | Gutless worm    | marine worm        | 303633             | 985.61                 | 1                       | 0.00            |
| 87    | 17878949  | Microbial    | ABI3730 (Sanger)  | Km3                             | Aquatic         | Marine          | deep-sea plankton  | 9046               | 796.1                  | 1                       | 0.01            |
| 88    | 18441115  | Viral        | ABI3730 (Sanger)  | Bear Paw                        | Terrestrial     | Hot spring      | freshwater         | 7771               | 985.11                 | 2                       | 0.03            |
| 89    | 18441115  | Viral        | ABI3730 (Sanger)  | Octopus                         | Terrestrial     | Hot spring      | freshwater         | 21356              | 1004.33                | 0                       | 0.00            |
| 90    | 18059494  | Microbial    | ABI3730 (Sanger)  | Octopus spring                  | Terrestrial     | Hot spring      | microbial mat      | 20390              | 979.56                 | 0                       | 0.00            |
| 91    | 18059494  | Microbial    | ABI3730 (Sanger)  | Mushroom spring                 | Terrestrial     | Hot spring      | microbial mat      | 9585               | 998.29                 | 0                       | 0.00            |
| 92    | 18725995  | Microbial    | GS FLX            | Mid-Bloom DNA-High CO2          | Aquatic         | Marine          | coastal            | 203825             | 227.1                  | 8                       | 0.00            |
| 93    | 18725995  | Microbial    | GS FLX            | Mid-Bloom DNA-Present Day       | Aquatic         | Marine          | coastal            | 130243             | 231.22                 | 12                      | 0.01            |
| 94    | 18725995  | Microbial    | GS FLX            | Post-Bloom DNA-High CO2         | Aquatic         | Marine          | coastal            | 324001             | 174.13                 | 4                       | 0.00            |
| 95    | 18725995  | Microbial    | GS FLX            | Post-Bloom DNA-Present Day      | Aquatic         | Marine          | coastal            | 294732             | 225.11                 | 11                      | 0.00            |
| 96    | 19114525  | Microbial    | GS FLX            | Wastewater metagenome           | Aquatic         | Wastewater      | sludge basin       | 353497             | 250.97                 | 8                       | 0.00            |
| 97    | 19801459  | Microbial    | GS FLX            | pyrosequencing-derived data set | Terrestrial     | Glacier Ice     | freshwater         | 1051604            | 223.54                 | 339                     | 0.03            |
| 98    | 19892985  | Viral        | GS FLX            | Spring                          | Terrestrial     | Antarctic lake  | freshwater         | 42206              | 237.82                 | 0                       | 0.00            |
| 99    | 19892985  | Viral        | GS FLX            | Summer                          | Terrestrial     | Antarctic lake  | freshwater         | 39803              | 220.6                  | 5                       | 0.01            |
| 100   | 19555373  | Viral        | GS FLX            | Effluent DNA                    | Terrestrial     | Reclaimed water | freshwater         | 255441             | 245.44                 | 0                       | 0.00            |
| 101   | 19555373  | Viral        | GS FLX            | Effluent RNA                    | Terrestrial     | Reclaimed water | freshwater         | 202145             | 222.15                 | 151                     | 0.07            |
| 102   | 19555373  | Viral        | GS FLX            | Nursery DNA                     | Terrestrial     | Reclaimed water | freshwater         | 275271             | 243.47                 | 1                       | 0.00            |
| 103   | 19555373  | Viral        | GS FLX            | Nursery RNA                     | Terrestrial     | Reclaimed water | freshwater         | 244797             | 232.67                 | 63                      | 0.03            |
| 104   | 19555373  | Viral        | GS FLX            | Potable DNA                     | Terrestrial     | Potable water   | freshwater         | 194282             | 222.91                 | 7247                    | 3.73            |
| 107   | 20182523  | Microbial    | ABI3730 (Sanger)  | FW106                           | Terrestrial     | Groundwater     | freshwater         | 5996               | 896.74                 | 0                       | 0.00            |
| 108   | 17355176  | Microbial    | ABI3730 (Sanger)  | GS00a                           | Aquatic         | Marine          | Open ocean         | 642739             | 1018.7                 | 40                      | 0.01            |
| 109   | 17355176  | Microbial    | ABI3730 (Sanger)  | GS00b                           | Aquatic         | Marine          | Open ocean         | 317180             | 1012.13                | 208                     | 0.07            |
| 110   | 17355176  | Microbial    | ABI3730 (Sanger)  | GS00c                           | Aquatic         | Marine          | Open ocean         | 368835             | 1007.74                | 127                     | 0.03            |

| MG_ID | PubMed ID | Type (V/M/E) | Sequencing method | Sample name in publication | Biome           | Environment | Sub-classification | # Reads (Filtered) | Mean Length (Filtered) | # Contamination C95-I94 | % Contamination |
|-------|-----------|--------------|-------------------|----------------------------|-----------------|-------------|--------------------|--------------------|------------------------|-------------------------|-----------------|
| 111   | 17355176  | Microbial    | ABI3730 (Sanger)  | GS00d                      | Aquatic         | Marine      | Open ocean         | 332240             | 1011.14                | 137                     | 0.04            |
| 112   | 17355176  | Microbial    | ABI3730 (Sanger)  | GS01a                      | Aquatic         | Marine      | Open ocean         | 139964             | 1005.09                | 99                      | 0.07            |
| 113   | 17355176  | Microbial    | ABI3730 (Sanger)  | GS01b                      | Aquatic         | Marine      | Open ocean         | 89952              | 987.18                 | 4                       | 0.00            |
| 114   | 17355176  | Microbial    | ABI3730 (Sanger)  | GS01c                      | Aquatic         | Marine      | Open ocean         | 92351              | 1003.66                | 35                      | 0.04            |
| 115   | 17355176  | Microbial    | ABI3730 (Sanger)  | GS02                       | Aquatic         | Marine      | Coastal            | 121590             | 1058.98                | 4                       | 0.00            |
| 116   | 17355176  | Microbial    | ABI3730 (Sanger)  | GS03                       | Aquatic         | Marine      | Coastal            | 61605              | 1086.07                | 2                       | 0.00            |
| 117   | 17355176  | Microbial    | ABI3730 (Sanger)  | GS04                       | Aquatic         | Marine      | Coastal            | 52959              | 1074.83                | 0                       | 0.00            |
| 118   | 17355176  | Microbial    | ABI3730 (Sanger)  | GS05                       | Aquatic         | Marine      | Embayment          | 61131              | 1079.37                | 0                       | 0.00            |
| 119   | 17355176  | Microbial    | ABI3730 (Sanger)  | GS06                       | Aquatic         | Marine      | Estuary            | 59679              | 1082.72                | 2                       | 0.00            |
| 120   | 17355176  | Microbial    | ABI3730 (Sanger)  | GS07                       | Aquatic         | Marine      | Coastal            | 50980              | 1087.31                | 2                       | 0.00            |
| 121   | 17355176  | Microbial    | ABI3730 (Sanger)  | GS08                       | Aquatic         | Marine      | Coastal            | 129655             | 1062.25                | 1120                    | 0.86            |
| 122   | 17355176  | Microbial    | ABI3730 (Sanger)  | GS09                       | Aquatic         | Marine      | Coastal            | 79303              | 1063.36                | 1078                    | 1.36            |
| 123   | 17355176  | Microbial    | ABI3730 (Sanger)  | GS10                       | Aquatic         | Marine      | Coastal            | 78304              | 1052.62                | 8                       | 0.01            |
| 124   | 17355176  | Microbial    | ABI3730 (Sanger)  | GS11                       | Aquatic         | Marine      | Estuary            | 124435             | 1070.85                | 20                      | 0.02            |
| 125   | 17355176  | Microbial    | ABI3730 (Sanger)  | GS12                       | Aquatic         | Marine      | Estuary            | 126162             | 1078.62                | 26                      | 0.02            |
| 126   | 17355176  | Microbial    | ABI3730 (Sanger)  | GS13                       | Aquatic         | Marine      | Coastal            | 138033             | 1079.51                | 2                       | 0.00            |
| 127   | 17355176  | Microbial    | ABI3730 (Sanger)  | GS14                       | Aquatic         | Marine      | Coastal            | 128885             | 1085.58                | 34                      | 0.03            |
| 128   | 17355176  | Microbial    | ABI3730 (Sanger)  | GS15                       | Aquatic         | Marine      | Coastal            | 127362             | 1083.79                | 61                      | 0.05            |
| 129   | 17355176  | Microbial    | ABI3730 (Sanger)  | GS16                       | Aquatic         | Marine      | Coastal            | 127122             | 1081.48                | 8                       | 0.01            |
| 130   | 17355176  | Microbial    | ABI3730 (Sanger)  | GS17                       | Aquatic         | Marine      | Open ocean         | 257581             | 1091.93                | 18                      | 0.01            |
| 131   | 17355176  | Microbial    | ABI3730 (Sanger)  | GS18                       | Aquatic         | Marine      | Open ocean         | 142743             | 1096.2                 | 275                     | 0.19            |
| 132   | 17355176  | Microbial    | ABI3730 (Sanger)  | GS19                       | Aquatic         | Marine      | Coastal            | 135325             | 1081.94                | 12                      | 0.01            |
| 133   | 17355176  | Microbial    | ABI3730 (Sanger)  | GS20                       | Aquatic         | Marine      | freshwater         | 296355             | 1063.42                | 58                      | 0.02            |
| 134   | 17355176  | Microbial    | ABI3730 (Sanger)  | GS21                       | Aquatic         | Marine      | Coastal            | 131798             | 1088.44                | 33                      | 0.03            |
| 135   | 17355176  | Microbial    | ABI3730 (Sanger)  | GS22                       | Aquatic         | Marine      | Open ocean         | 121662             | 1077.41                | 15                      | 0.01            |
| 136   | 17355176  | Microbial    | ABI3730 (Sanger)  | GS23                       | Aquatic         | Marine      | Open ocean         | 133051             | 1079.49                | 1                       | 0.00            |
| 137   | 17355176  | Microbial    | ABI3730 (Sanger)  | GS25                       | Aquatic         | Marine      | Reef               | 120671             | 1075.5                 | 5                       | 0.00            |
| 138   | 17355176  | Microbial    | ABI3730 (Sanger)  | GS26                       | Aquatic         | Marine      | Open ocean         | 102708             | 1061.74                | 29                      | 0.03            |
| 139   | 17355176  | Microbial    | ABI3730 (Sanger)  | GS27                       | Aquatic         | Marine      | Coastal            | 222080             | 1068.65                | 10                      | 0.00            |
| 140   | 17355176  | Microbial    | ABI3730 (Sanger)  | GS28                       | Aquatic         | Marine      | Coastal            | 189052             | 1084.4                 | 1                       | 0.00            |
| 141   | 17355176  | Microbial    | ABI3730 (Sanger)  | GS29                       | Aquatic         | Marine      | Coastal            | 131529             | 1093.47                | 82                      | 0.06            |
| 142   | 17355176  | Microbial    | ABI3730 (Sanger)  | GS30                       | Aquatic         | Marine      | Warm seep          | 358972             | 1088.28                | 10                      | 0.00            |
| 143   | 17355176  | Microbial    | ABI3730 (Sanger)  | GS31                       | Aquatic         | Marine      | Coastal            | 436401             | 1057.91                | 106                     | 0.02            |
| 144   | 17355176  | Microbial    | ABI3730 (Sanger)  | GS32                       | Aquatic         | Marine      | Mangrove           | 147797             | 1031.74                | 21                      | 0.01            |
| 145   | 17355176  | Microbial    | ABI3730 (Sanger)  | GS33                       | Aquatic         | Marine      | Hypersaline        | 692255             | 1054.1                 | 25                      | 0.00            |
| 146   | 17355176  | Microbial    | ABI3730 (Sanger)  | GS34                       | Aquatic         | Marine      | Coastal            | 134347             | 1058.45                | 2                       | 0.00            |
| 147   | 17355176  | Microbial    | ABI3730 (Sanger)  | GS35                       | Aquatic         | Marine      | Coastal            | 140814             | 1078.3                 | 2                       | 0.00            |
| 148   | 17355176  | Microbial    | ABI3730 (Sanger)  | GS36                       | Aquatic         | Marine      | Coastal            | 77538              | 1106.01                | 0                       | 0.00            |
| 149   | 17355176  | Microbial    | ABI3730 (Sanger)  | GS37                       | Aquatic         | Marine      | Open ocean         | 65670              | 1045.4                 | 13                      | 0.02            |
| 150   | 17355176  | Microbial    | ABI3730 (Sanger)  | GS47                       | Aquatic         | Marine      | Open ocean         | 66023              | 1035.1                 | 1                       | 0.00            |
| 151   | 17355176  | Microbial    | ABI3730 (Sanger)  | GS51                       | Aquatic         | Marine      | Reef               | 128982             | 1089.28                | 2                       | 0.00            |
| 152   | 20573248  | Viral        | GS FLX Titanium   | LIB019                     | Host-associated | Mosquito    | mosquitoes         | 35093              | 210.59                 | 474                     | 1.35            |
| 153   | 20573248  | Viral        | GS FLX Titanium   | LIB020                     | Host-associated | Mouse       | brain tissue       | 13899              | 166.71                 | 4070                    | 29.28           |
| 154   | 20573248  | Viral        | GS FLX Titanium   | LIB021                     | Host-associated | Mouse       | brain tissue       | 41189              | 165.29                 | 10084                   | 24.48           |
| 155   | 20631792  | Viral        | GS FLX            | F1T1.1                     | Host-associated | Human       | fecal              | 22910              | 237.48                 | 0                       | 0.00            |
| 156   | 20631792  | Viral        | GS FLX            | F1T1.3                     | Host-associated | Human       | fecal              | 43335              | 239.61                 | 0                       | 0.00            |
| 157   | 20631792  | Viral        | GS FLX            | F1T2.1                     | Host-associated | Human       | fecal              | 42657              | 240.2                  | 0                       | 0.00            |
| 158   | 20631792  | Viral        | GS FLX            | F1T2.1(R)                  | Host-associated | Human       | fecal              | 29917              | 244.69                 | 0                       | 0.00            |
| 159   | 20631792  | Viral        | GS FLX            | F1T2.2                     | Host-associated | Human       | fecal              | 30711              | 235.49                 | 0                       | 0.00            |
| 160   | 20631792  | Viral        | GS FLX            | F1T2.3                     | Host-associated | Human       | fecal              | 27769              | 238.53                 | 1                       | 0.00            |
| 161   | 20631792  | Viral        | GS FLX            | F1M.1                      | Host-associated | Human       | fecal              | 48283              | 244.48                 | 0                       | 0.00            |
| 162   | 20631792  | Viral        | GS FLX            | F1M.2                      | Host-associated | Human       | fecal              | 24288              | 246.21                 | 1                       | 0.00            |
| 163   | 20631792  | Viral        | GS FLX            | F2T1.1                     | Host-associated | Human       | fecal              | 70413              | 243.26                 | 0                       | 0.00            |
| 164   | 20631792  | Viral        | GS FLX            | F2T1.1(R)                  | Host-associated | Human       | fecal              | 19340              | 244.08                 | 1                       | 0.01            |

| MG_ID | PubMed ID | Type (V/M/E) | Sequencing method | Sample name in publication | Biome           | Environment | Sub-classification | # Reads (Filtered) | Mean Length (Filtered) | # Contamination C95-I94 | % Contamination |
|-------|-----------|--------------|-------------------|----------------------------|-----------------|-------------|--------------------|--------------------|------------------------|-------------------------|-----------------|
| 165   | 20631792  | Viral        | GS FLX            | F2T1.2                     | Host-associated | Human       | fecal              | 40014              | 244.61                 | 0                       | 0.00            |
| 166   | 20631792  | Viral        | GS FLX            | F2T1.3                     | Host-associated | Human       | fecal              | 26397              | 247.12                 | 0                       | 0.00            |
| 167   | 20631792  | Viral        | GS FLX            | F2T2.1                     | Host-associated | Human       | fecal              | 40342              | 238.43                 | 0                       | 0.00            |
| 168   | 20631792  | Viral        | GS FLX            | F2T2.1(R)                  | Host-associated | Human       | fecal              | 41414              | 241.5                  | 0                       | 0.00            |
| 169   | 20631792  | Viral        | GS FLX            | F2T2.2                     | Host-associated | Human       | fecal              | 35959              | 243.62                 | 0                       | 0.00            |
| 170   | 20631792  | Viral        | GS FLX            | F2M.1                      | Host-associated | Human       | fecal              | 57719              | 244.04                 | 4                       | 0.01            |
| 171   | 20631792  | Viral        | GS FLX            | F2M.1(R)                   | Host-associated | Human       | fecal              | 33724              | 244.67                 | 5                       | 0.01            |
| 172   | 20631792  | Viral        | GS FLX            | F2M.2                      | Host-associated | Human       | fecal              | 27393              | 240.91                 | 0                       | 0.00            |
| 173   | 20631792  | Viral        | GS FLX            | F2M.3                      | Host-associated | Human       | fecal              | 35282              | 242.34                 | 0                       | 0.00            |
| 174   | 20631792  | Viral        | GS FLX            | F3T1.1                     | Host-associated | Human       | fecal              | 18371              | 242.74                 | 0                       | 0.00            |
| 175   | 20631792  | Viral        | GS FLX            | F3T1.2                     | Host-associated | Human       | fecal              | 19642              | 242.29                 | 0                       | 0.00            |
| 176   | 20631792  | Viral        | GS FLX            | F3T1.3                     | Host-associated | Human       | fecal              | 30120              | 242                    | 1                       | 0.00            |
| 177   | 20631792  | Viral        | GS FLX            | F3T2.1                     | Host-associated | Human       | fecal              | 53001              | 236.57                 | 0                       | 0.00            |
| 178   | 20631792  | Viral        | GS FLX            | F3T2.2                     | Host-associated | Human       | fecal              | 33499              | 242.3                  | 0                       | 0.00            |
| 179   | 20631792  | Viral        | GS FLX            | F3T2.3                     | Host-associated | Human       | fecal              | 28680              | 240.99                 | 0                       | 0.00            |
| 180   | 20631792  | Viral        | GS FLX            | F3M.1                      | Host-associated | Human       | fecal              | 24835              | 240.89                 | 1                       | 0.00            |
| 181   | 20631792  | Viral        | GS FLX            | F3M.2                      | Host-associated | Human       | fecal              | 37385              | 242.22                 | 0                       | 0.00            |
| 182   | 20631792  | Viral        | GS FLX            | F4T1.1                     | Host-associated | Human       | fecal              | 24319              | 243.19                 | 0                       | 0.00            |
| 183   | 20631792  | Viral        | GS FLX            | F4T1.2                     | Host-associated | Human       | fecal              | 20410              | 239.47                 | 1                       | 0.00            |
| 184   | 20631792  | Viral        | GS FLX            | F4T1.3                     | Host-associated | Human       | fecal              | 14362              | 238                    | 0                       | 0.00            |
| 185   | 20631792  | Viral        | GS FLX            | F4T2.1                     | Host-associated | Human       | fecal              | 27695              | 243.16                 | 0                       | 0.00            |
| 186   | 20631792  | Viral        | GS FLX            | F4T2.3                     | Host-associated | Human       | fecal              | 29647              | 238.47                 | 0                       | 0.00            |
| 187   | 20631792  | Viral        | GS FLX            | F4M.1                      | Host-associated | Human       | fecal              | 24715              | 238.65                 | 0                       | 0.00            |
| 188   | 20631792  | Viral        | GS FLX            | F4M.2                      | Host-associated | Human       | fecal              | 23461              | 239.42                 | 0                       | 0.00            |
| 189   | 20631792  | Viral        | GS FLX            | F4M.3                      | Host-associated | Human       | fecal              | 29888              | 244.97                 | 0                       | 0.00            |
| 190   | 20631792  | Viral        | GS FLX            | F4M.3(R)                   | Host-associated | Human       | fecal              | 15926              | 245.43                 | 0                       | 0.00            |
| 191   | 20631792  | Viral        | GS FLX            | F5T2.1                     | Host-associated | Human       | fecal              | 47959              | 242.78                 | 1                       | 0.00            |
| 192   | 20631792  | Viral        | GS FLX            | F5T2.1(R)                  | Host-associated | Human       | fecal              | 72279              | 240.97                 | 1                       | 0.00            |
| 193   | 20668239  | Microbial    | GS FLX            | Meconium                   | Host-associated | Human       | fecal              | 44832              | 266.12                 | 11                      | 0.02            |
| 194   | 20668239  | Microbial    | GS FLX            | 6                          | Host-associated | Human       | fecal              | 4657               | 288.71                 | 0                       | 0.00            |
| 195   | 20668239  | Microbial    | GS FLX            | 85                         | Host-associated | Human       | fecal              | 1897               | 238.51                 | 10                      | 0.53            |
| 196   | 20668239  | Microbial    | GS FLX            | 92                         | Host-associated | Human       | fecal              | 3392               | 232.73                 | 85                      | 2.51            |
| 197   | 20668239  | Microbial    | GS FLX            | 98                         | Host-associated | Human       | fecal              | 10265              | 244.98                 | 10                      | 0.10            |
| 198   | 20668239  | Microbial    | GS FLX            | 100                        | Host-associated | Human       | fecal              | 5922               | 235.97                 | 34                      | 0.57            |
| 199   | 20668239  | Microbial    | GS FLX            | 118                        | Host-associated | Human       | fecal              | 6081               | 249.81                 | 0                       | 0.00            |
| 200   | 20668239  | Microbial    | GS FLX            | 371                        | Host-associated | Human       | fecal              | 174758             | 252.41                 | 17                      | 0.01            |
| 201   | 20668239  | Microbial    | GS FLX            | 413                        | Host-associated | Human       | fecal              | 50711              | 256.75                 | 1                       | 0.00            |
| 202   | 20668239  | Microbial    | GS FLX            | 432                        | Host-associated | Human       | fecal              | 148539             | 248.25                 | 68                      | 0.05            |
| 203   | 20668239  | Microbial    | GS FLX            | 441                        | Host-associated | Human       | fecal              | 62021              | 259.76                 | 6                       | 0.01            |
| 204   | 20668239  | Microbial    | GS FLX            | 454                        | Host-associated | Human       | fecal              | 19894              | 248.28                 | 1                       | 0.01            |
